# Supplementary material for: Sustainable Sheep Wool/Soy Protein Biocomposites for Sound Absorption
Source: MDPI journal article supplement (doi:10.3390/polym14235231), 2022-12-01
Supplement: s1 [file s1]

**Table S1.** Sound absorption coefficients at normal incidence of SPI7, SPI10, and SPI15 biocomposites as a function of thickness (30, 45, and 60 mm).

| f (Hz) | SPI7              |             |             | SPI10       |             |             | SPI15       |             |             |             |
|--------|-------------------|-------------|-------------|-------------|-------------|-------------|-------------|-------------|-------------|-------------|
|        | Thickness<br>(mm) | 30          | 45          | 60          | 30          | 45          | 60          | 30          | 45          | 60          |
| 100    |                   | 0.018±0.004 | 0.038±0.009 | 0.06±0.02   | 0.03±0.02   | 0.02±0.02   | 0±0         | 0.05±0.03   | 0.012±0.07  | 0±0         |
| 125    |                   | 0.03±0.02   | 0.06±0.01   | 0.11±0.03   | 0.022±0.008 | 0.032±0.005 | 0.007±0.006 | 0.03±0.01   | 0.02±0.01   | 0.044±0.007 |
| 160    |                   | 0.14±0.03   | 0.16±0.03   | 0.30±0.02   | 0.08±0.02   | 0.12±0.03   | 0.084±0.007 | 0.09±0.03   | 0.15±0.04   | 0.122±0.003 |
| 200    |                   | 0.27±0.05   | 0.23±0.05   | 0.44±0.04   | 0.20±0.04   | 0.19±0.04   | 0.188±0.009 | 0.17±0.03   | 0.27±0.04   | 0.231±0.005 |
| 250    |                   | 0.29±0.04   | 0.31±0.03   | 0.55±0.03   | 0.21±0.04   | 0.26±0.05   | 0.31±0.01   | 0.23±0.04   | 0.35±0.04   | 0.321±0.003 |
| 315    |                   | 0.27±0.02   | 0.47±0.03   | 0.74±0.01   | 0.21±0.02   | 0.33±0.02   | 0.49±0.02   | 0.19±0.01   | 0.41±0.02   | 0.50±0.01   |
| 400    |                   | 0.274±0.006 | 0.62±0.03   | 0.840±0.006 | 0.188±0.006 | 0.39±0.01   | 0.70±0.02   | 0.197±0.008 | 0.48±0.02   | 0.64±0.01   |
| 500    |                   | 0.42±0.02   | 0.80±0.02   | 0.89±0.01   | 0.278±0.008 | 0.59±0.01   | 0.90±0.02   | 0.302±0.006 | 0.65±0.01   | 0.85±0.01   |
| 630    |                   | 0.56±0.01   | 0.868±0.009 | 0.89±0.02   | 0.417±0.009 | 0.803±0.007 | 0.987±0.002 | 0.46±0.01   | 0.839±0.007 | 0.982±0.004 |
| 800    |                   | 0.76±0.02   | 0.898±0.009 | 0.82±0.02   | 0.583±0.009 | 0.959±0.004 | 0.92±0.01   | 0.64±0.01   | 0.967±0.008 | 0.959±0.006 |
| 1000   |                   | 0.94±0.01   | 0.90±0.01   | 0.75±0.02   | 0.790±0.005 | 0.970±0.001 | 0.83±0.01   | 0.84±0.01   | 0.973±0.003 | 0.86±0.01   |
| 1250   |                   | 0.961±0.008 | 0.78±0.02   | 0.76±0.02   | 0.946±0.004 | 0.877±0.003 | 0.80±0.01   | 0.969±0.005 | 0.89±0.01   | 0.80±0.01   |
| 1600   |                   | 0.86±0.02   | 0.76±0.02   | 0.84±0.02   | 0.960±0.007 | 0.789±0.003 | 0.87±0.01   | 0.939±0.005 | 0.82±0.01   | 0.8±0.02    |
| 2000   |                   | 0.78±0.02   | 0.85±0.01   | 0.86±0.02   | 0.866±0.007 | 0.795±0.006 | 0.940±0.009 | 0.832±0.008 | 0.82±0.01   | 0.94±0.01   |
| 2500   |                   | 0.79±0.01   | 0.88±0.02   | 0.88±0.01   | 0.781±0.005 | 0.914±0.007 | 0.90±0.01   | 0.770±0.008 | 0.91±0.01   | 0.92±0.01   |
| 3150   |                   | 0.90±0.01   | 0.85±0.02   | 0.931±0.003 | 0.815±0.005 | 0.958±0.005 | 0.931±0.008 | 0.849±0.009 | 0.936±0.006 | 0.92±0.01   |
| 4000   |                   | 0.976±0.003 | 0.86±0.02   | 0.959±0.006 | 0.938±0.008 | 0.929±0.008 | 0.949±0.009 | 0.963±0.005 | 0.92±0.01   | 0.95±0.01   |
| 5000   |                   | 0.949±0.005 | 0.84±0.03   | 0.964±0.007 | 0.96±0.01   | 0.958±0.004 | 0.90±0.02   | 0.923±0.007 | 0.92±0.01   | 0.96±0.01   |

**Table S2.** Sound absorption coefficients at normal incidence of wool/SPI composite SPI20 biocomposite as a function of sample thickness (18, 30, 35, 45, and 60 mm).

| f (Hz) | Thickness |             |               |             |             |             |
|--------|-----------|-------------|---------------|-------------|-------------|-------------|
|        | (mm)      | 18          | 30            | 35          | 45          | 60          |
| 100    |           | 0.03±0.02   | 0.0049±0.0008 | 0.03±0.01   | 0.03±0.01   | 0.03±0.01   |
| 125    |           | 0.06±0.04   | 0±0           | 0.04±0.01   | 0.04±0.01   | 0.07±0.02   |
| 160    |           | 0.03±0.02   | 0.0004±0.0003 | 0.07±0.01   | 0.20±0.04   | 0.22±0.01   |
| 200    |           | 0.03±0.03   | 0.06±0.03     | 0.11±0.02   | 0.29±0.05   | 0.36±0.05   |
| 250    |           | 0.04±0.02   | 0.13±0.03     | 0.15±0.03   | 0.32±0.03   | 0.48±0.03   |
| 315    |           | 0.055±0.009 | 0.181±0.007   | 0.175±0.007 | 0.41±0.02   | 0.60±0.02   |
| 400    |           | 0.12±0.01   | 0.316±0.005   | 0.229±0.008 | 0.490±0.006 | 0.738±0.008 |
| 500    |           | 0.131±0.005 | 0.447±0.006   | 0.33±0.01   | 0.669±0.006 | 0.875±0.005 |
| 630    |           | 0.173±0.008 | 0.622±0.009   | 0.47±0.01   | 0.826±0.004 | 0.937±0.002 |
| 800    |           | 0.240±0.008 | 0.80±0.001    | 0.62±0.02   | 0.924±0.003 | 0.935±0.004 |
| 1000   |           | 0.33±0.01   | 0.929±0.006   | 0.78±0.02   | 0.965±0.005 | 0.914±0.004 |
| 1250   |           | 0.45±0.02   | 0.985±0.001   | 0.915±0.005 | 0.945±0.004 | 0.848±0.006 |
| 1600   |           | 0.63±0.03   | 0.944±0.006   | 0.990±0.001 | 0.864±0.003 | 0.832±0.009 |
| 2000   |           | 0.81±0.03   | 0.853±0.006   | 0.951±0.006 | 0.819±0.005 | 0.895±0.008 |
| 2500   |           | 0.96±0.01   | 0.808±0.004   | 0.877±0.006 | 0.863±0.006 | 0.927±0.005 |
| 3150   |           | 0.986±0.002 | 0.856±0.005   | 0.848±0.005 | 0.935±0.004 | 0.905±0.006 |
| 4000   |           | 0.93±0.01   | 0.931±0.009   | 0.897±0.006 | 0.928±0.008 | 0.917±0.008 |
| 5000   |           | 0.887±0.007 | 0.91±0.02     | 0.955±0.005 | 0.92±0.01   | 0.911±0.007 |
